# Supplementary material for: Genomic profile of advanced breast cancer in circulating tumour DNA
Source: PubMed Central journal article supplement (PMC8065112; doi:10.1038/s41467-021-22605-2), 2021-04-23
Supplement: 41467_2021_22605_MOESM1_ESM.pdf [file 41467_2021_22605_MOESM1_ESM.pdf]

# Genomic Profile of Advanced Breast Cancer in Circulating Tumor DNA

## Supplemental Figures and Tables

Supplementary Figures 1 - 16

Supplementary Tables 1 - 4

Supplementary Fig. 1. plasmaMATCH trial design

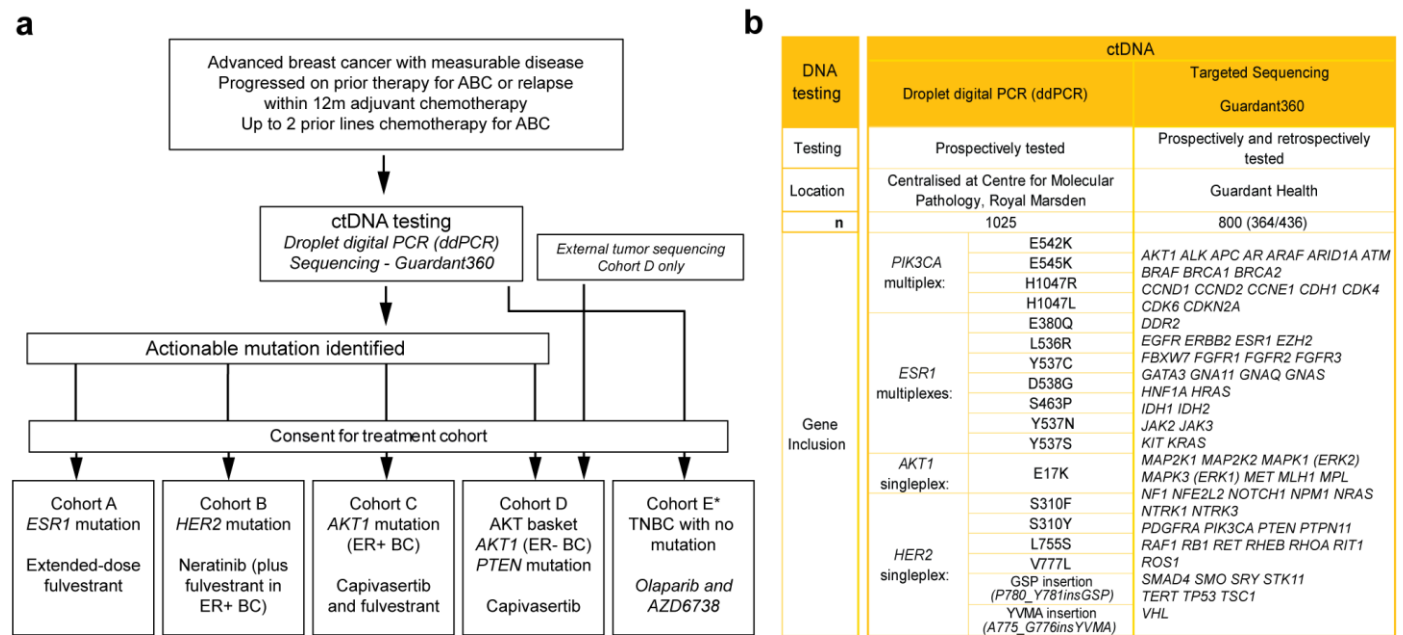

a) PlasmaMATCH trial scheme: Advanced breast cancer patients with disease progression after prior therapy, and following consent, were offered ctDNA testing by droplet digital PCR (ddPCR) for the presence of actionable mutations in *ESR1*, *HER2*, *PIK3CA* and *AKT1* or targeted sequencing. Patients were enrolled into one of the five interventional arms based on the mutations detected in plasma, which is reported separately<sup>1</sup>, with cohort E \*ongoing.

b) Circulating tumor DNA (ctDNA) testing for patients in plasmaMATCH. Droplet digital PCR (ddPCR) tested for hotspot mutations in *ESR1*, *HER2*, *PIK3CA* and *AKT1* while targeted sequencing employed a duplex sequencing 73/74 gene panel (Guardant360)<sup>2</sup>. Of 800 patients who underwent targeted sequencing, 364 did so prospectively as part of the trial, and 436 retrospectively from banked baseline plasma (“Methods”).

Supplementary Fig. 2: Degree of elevated gene copy number in circulating tumor DNA

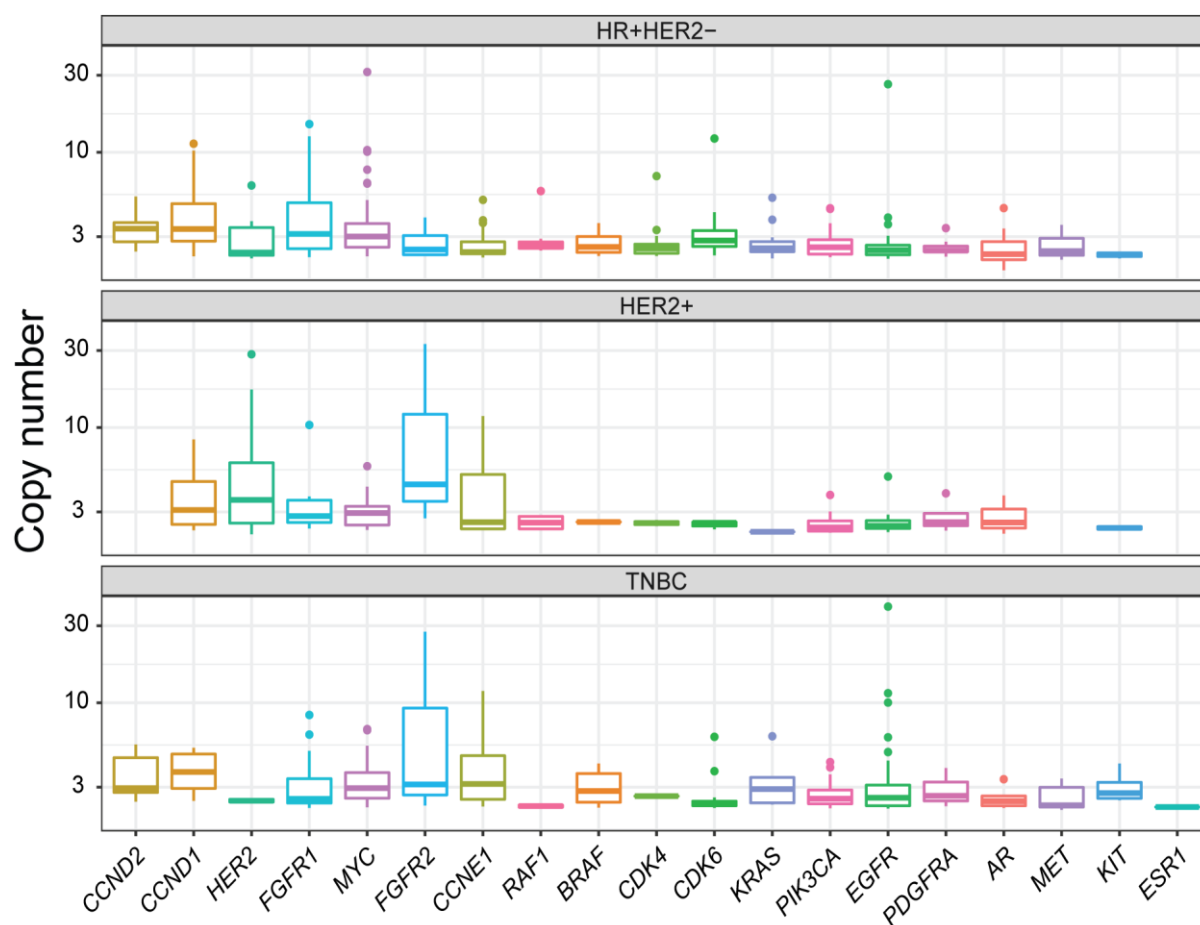

Copy number (CN) in plasma for indicated genes in patients with elevated plasma copy number, by breast cancer subtype, to identify genes likely amplified at high copy number (HR+HER2- N=515, HER2+ N=72, TNBC N=138). Data are presented as a boxplot, where the middle line is the median, the lower and upper hinges represent the 25<sup>th</sup> and 75<sup>th</sup> centiles respectively and the whiskers extend from the hinge to the smallest and largest value, respectively, no further than 1.5 x IQR (interquartile range) from the lower or upper hinge. Data outside of these ranges are plotted individually.

Supplementary Fig. 3: Sensitivity and specificity of Guardant360 targeted sequencing

| All mutation calls  |          | ddPCR    |          |             | %    |
|---------------------|----------|----------|----------|-------------|------|
|                     |          | Positive | Negative |             |      |
| Targeted Sequencing | Positive | 492      | 77       | Sensitivity | 90.9 |
|                     | Negative | 49       | 9841     | Specificity | 99.2 |
|                     |          |          |          | ppv         | 86.5 |
|                     |          |          |          | npv         | 99.5 |

  

| ddPCR AF<1%         |          | ddPCR    |          |             | %    |
|---------------------|----------|----------|----------|-------------|------|
|                     |          | Positive | Negative |             |      |
| Targeted Sequencing | Positive | 161      | 77       | Sensitivity | 80.9 |
|                     | Negative | 38       | 9841     | Specificity | 99.2 |
|                     |          |          |          | ppv         | 67.6 |
|                     |          |          |          | npv         | 99.6 |

Sensitivity and specificity of targeted panel sequencing (Guardant360) compared to droplet digital PCR (ddPCR) in N=682 patients who underwent testing for hotspot mutations within *PIK3CA*, *ESR1*, *HER2* and *AKT1* (Supplementary Fig. 1b) using both technologies. The upper table represents all mutations at all allele frequencies (AF). The lower table includes mutations with ddPCR AF<1%. The sensitivity of targeted sequencing in identifying mutations is 90.9%, and remains high at 80.9% for mutations at low AF.

Supplementary Fig. 4: Co-occurrence and mutual exclusivity of mutations in HR+HER2- breast cancer

## HR+HER2-

|               | <i>ESR1</i> | <i>PIK3CA</i> | <i>TP53</i> | <i>GATA3</i> | <i>ARID1A</i> | <i>PTEN</i> | <i>HER2</i> | <i>NF1</i> | <i>KRAS</i> | <i>AKT1</i> | <i>RB1</i> |
|---------------|-------------|---------------|-------------|--------------|---------------|-------------|-------------|------------|-------------|-------------|------------|
| <i>RB1</i>    |             |               |             |              |               |             |             |            |             |             |            |
| <i>AKT1</i>   |             |               |             |              |               |             |             |            |             |             |            |
| <i>KRAS</i>   |             | 0.022         |             |              |               |             |             |            |             |             |            |
| <i>NF1</i>    |             |               |             |              |               | 0.023       |             |            |             |             |            |
| <i>HER2</i>   |             |               |             | 0.009        |               |             |             |            |             |             |            |
| <i>PTEN</i>   |             |               | 0.023       |              |               |             |             |            |             |             |            |
| <i>ARID1A</i> |             |               |             |              |               |             |             |            |             |             |            |
| <i>GATA3</i>  |             | 0.028         |             |              |               |             |             |            |             |             |            |
| <i>TP53</i>   | 0.002       |               |             |              |               |             |             |            |             |             |            |
| <i>PIK3CA</i> |             |               |             |              |               |             |             |            |             |             |            |
| <i>ESR1</i>   |             |               |             |              |               |             |             |            |             |             |            |

Mutually Exclusive  
 q value < 0.05  
 p value < 0.05

Co-occurrent  
 q value < 0.05  
 p value < 0.05

Association analysis for most frequent mutated genes in HR+HER2- breast cancer (N=515 patients) with two-sided Fisher's exact test p values. Green genes showing mutual exclusivity, and purple co-occurrence with dark colours indicating significance following false discovery correction.

Supplementary Fig. 5: Correlation of *ESR1* and *MAPK* pathway mutation allele frequency from the same patient

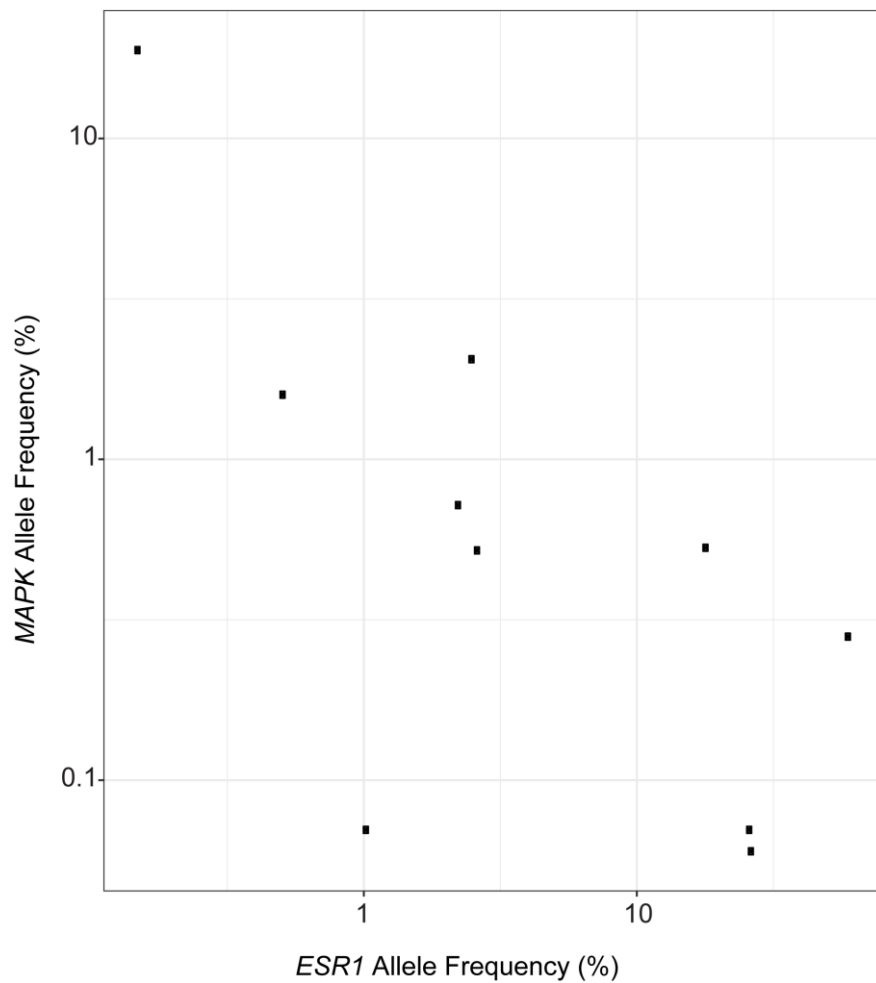

Correlation of allele frequency of *ESR1* and *MAPK* pathway mutations from the same patient, in patients with single *ESR1* and *MAPK* mutations (N=10). Spearman correlation coefficient -0.264,  $p=0.017$  (two-sided). Includes all patients with HR+HER2- disease and single mutations in both.

Supplementary Fig. 6: Mutational profile of plasmaMATCH compared to TCGA

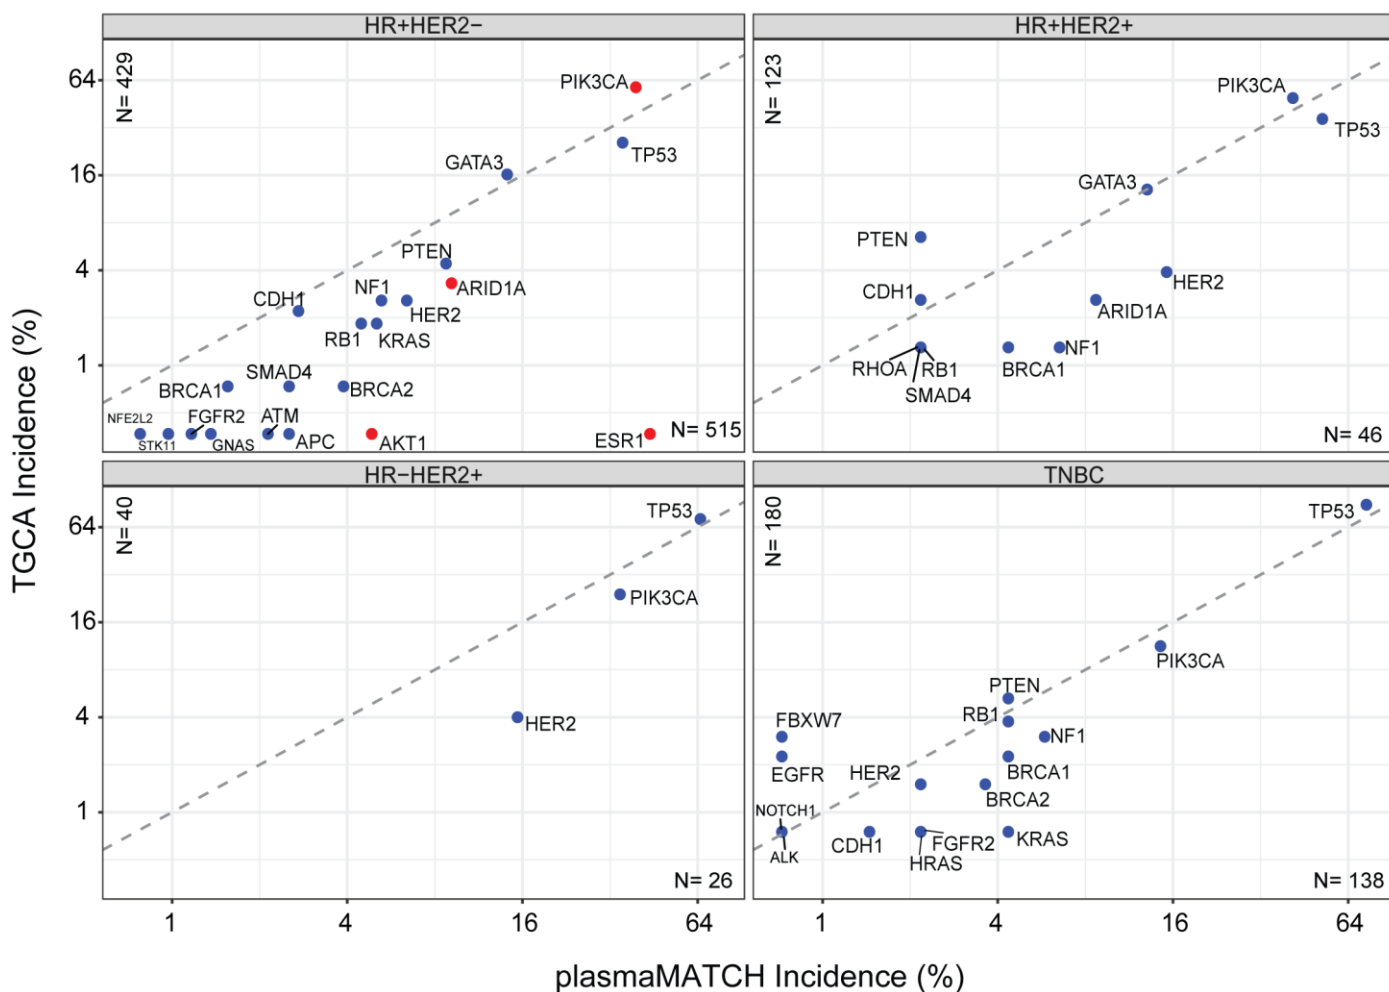

Mutational profile of ctDNA in plasmaMATCH compared to published large primary breast cancer tissue sequencing dataset (TCGA)<sup>3</sup>. Red dots indicate significant change in frequency after false discovery adjusted two-sided Fishers exact test (HR+HER2-: *ESR1*  $q < 0.0001$ , *PIK3CA*  $q < 0.0001$ , *AKT1*  $q = 0.006$ , *ARID1A*  $q = 0.04$ ). Included are genes with an incidence 1.5% in both data sets. N indicates the number of patients included in each group.

Supplementary Fig. 7: Validation of rare and hotspot mutations in *HER2* by droplet digital PCR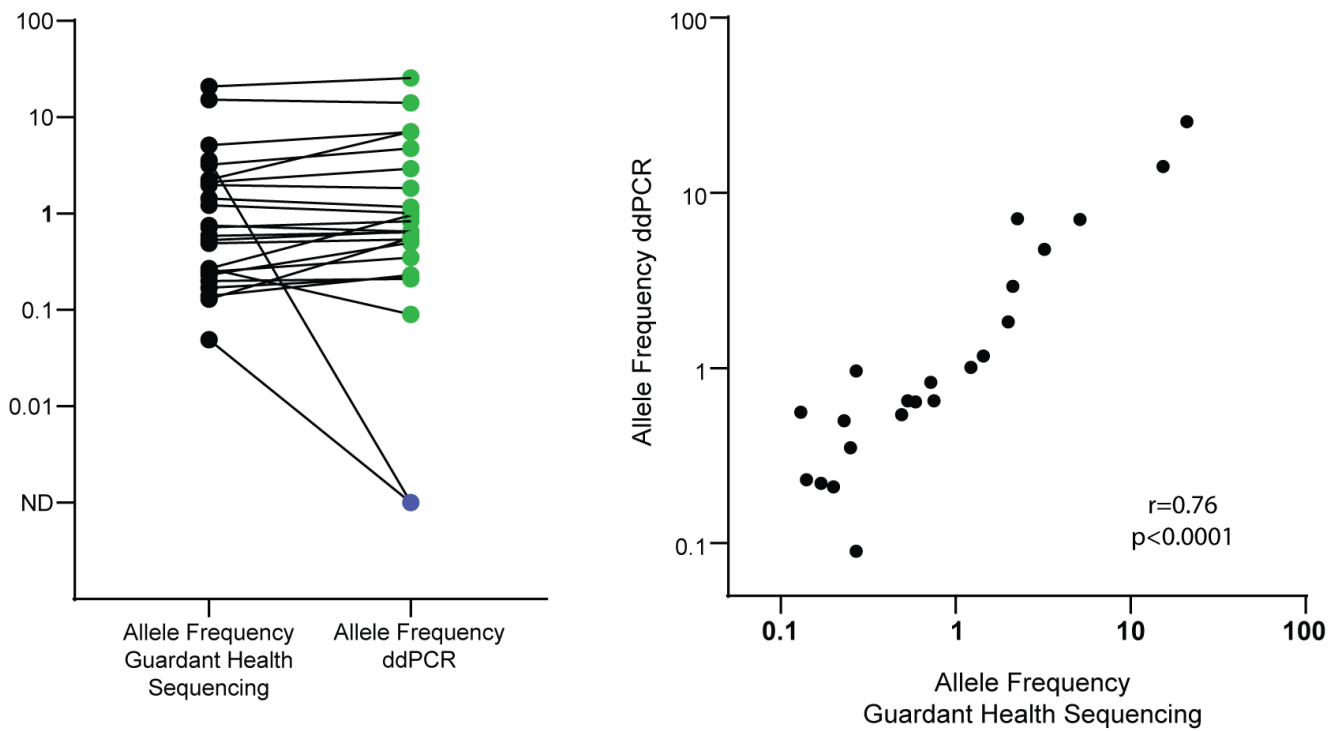

Association between allele frequency in ctDNA sequencing and validation analysis with plasma DNA droplet digital PCR (ddPCR), N=24 *HER2* mutation assays. 22/24 (91.7%) mutations were validated by ddPCR. Spearman correlation coefficient 0.76,  $P<0.0001$  (two-sided). ND, not detected.



Supplementary Fig. 8: Prior therapy and mutations prevalence in HR+HER2- advanced breast cancer

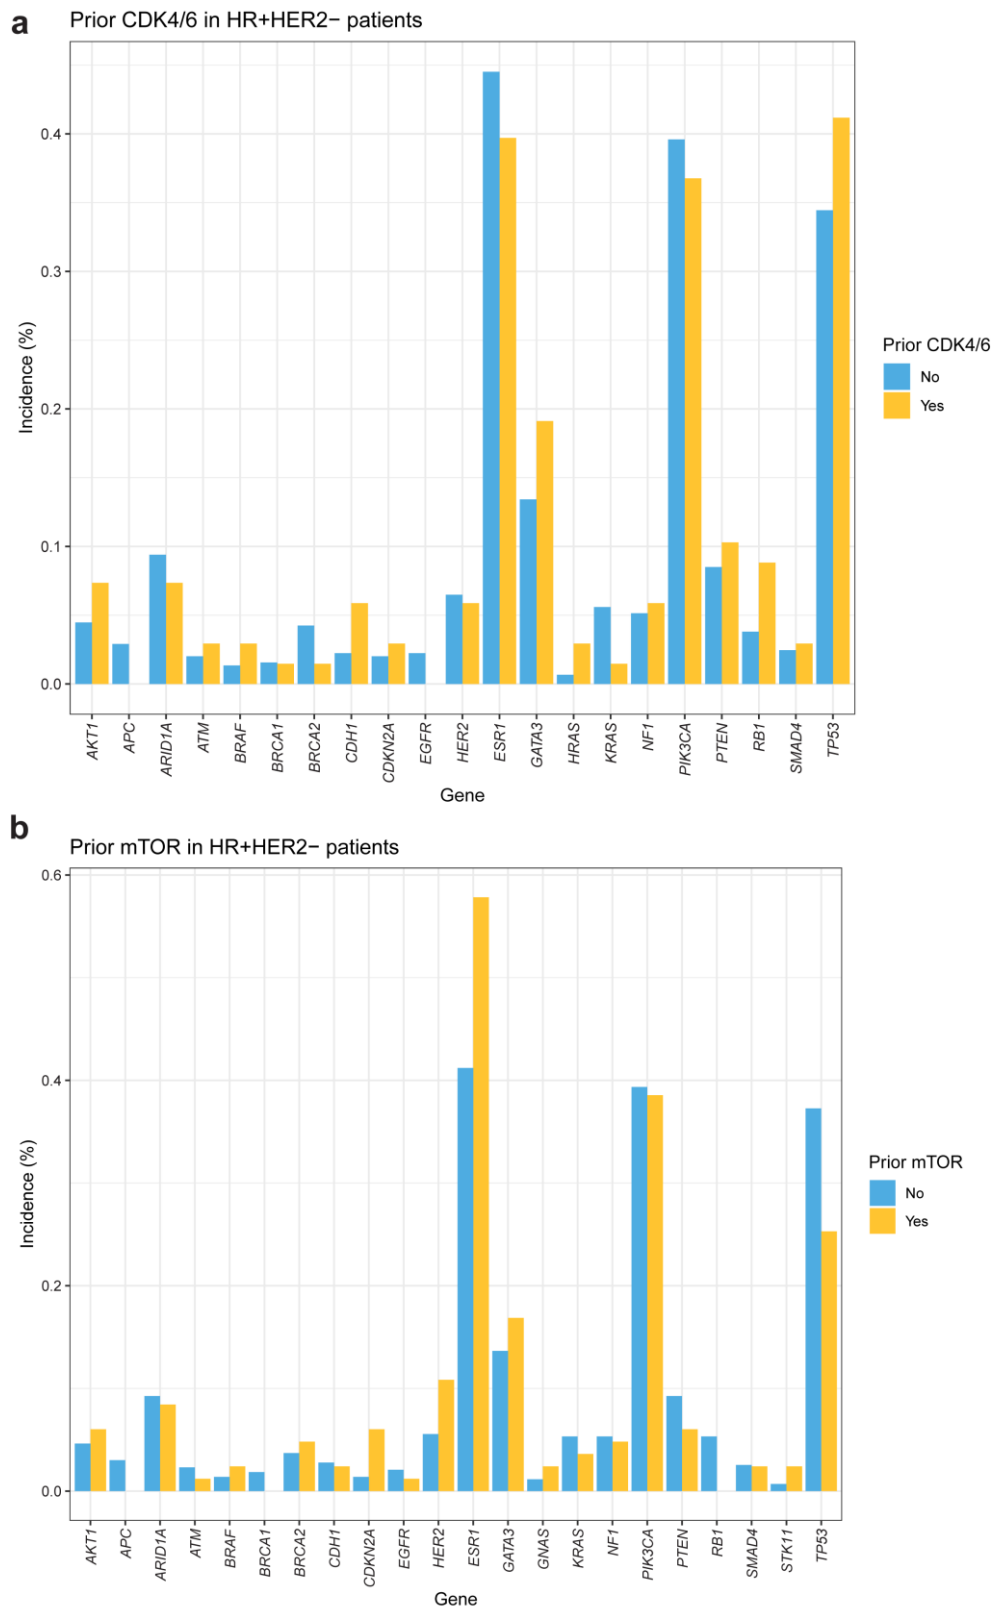

a) Mutation incidence in HR+HER2- breast cancer with (N=68 patients) and without (N=447 patients) prior exposure CDK4/6 inhibitor. Genes with an incidence of 1.5% or more in either group are shown.

b) Mutation incidence in HR+HER2- breast cancer with (N=83 patients) and without (N=432 patients) prior exposure mTOR inhibitor everolimus.

Supplementary Fig. 9: Cis-trans analysis of *ESR1* mutations

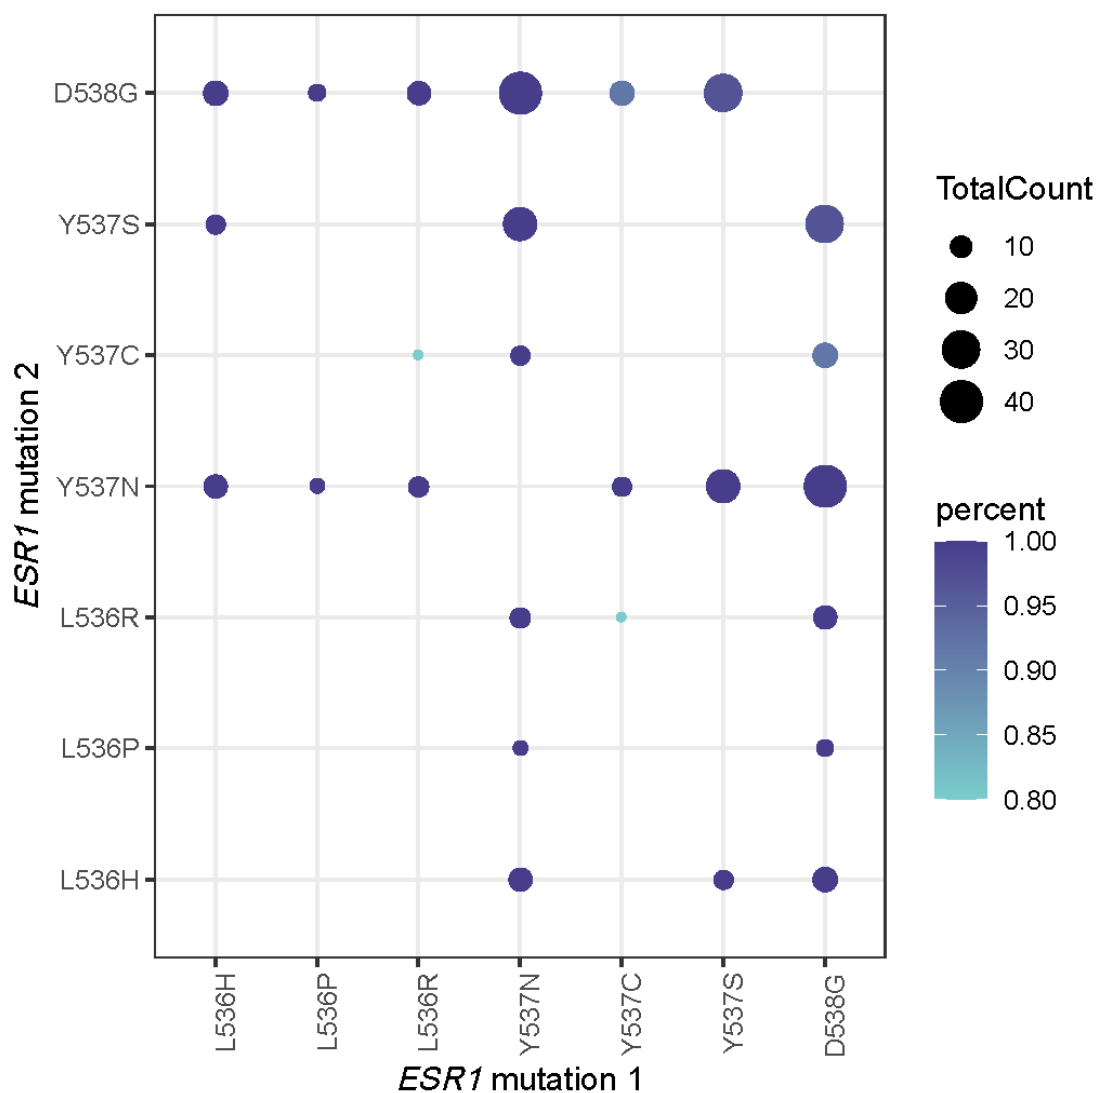

In patients with assessable multiple *ESR1* mutations (N=290), the fraction of mutation pairs that occur in trans.

Supplementary Fig. 10: Clonality of mutations with time from diagnosis of early breast cancer

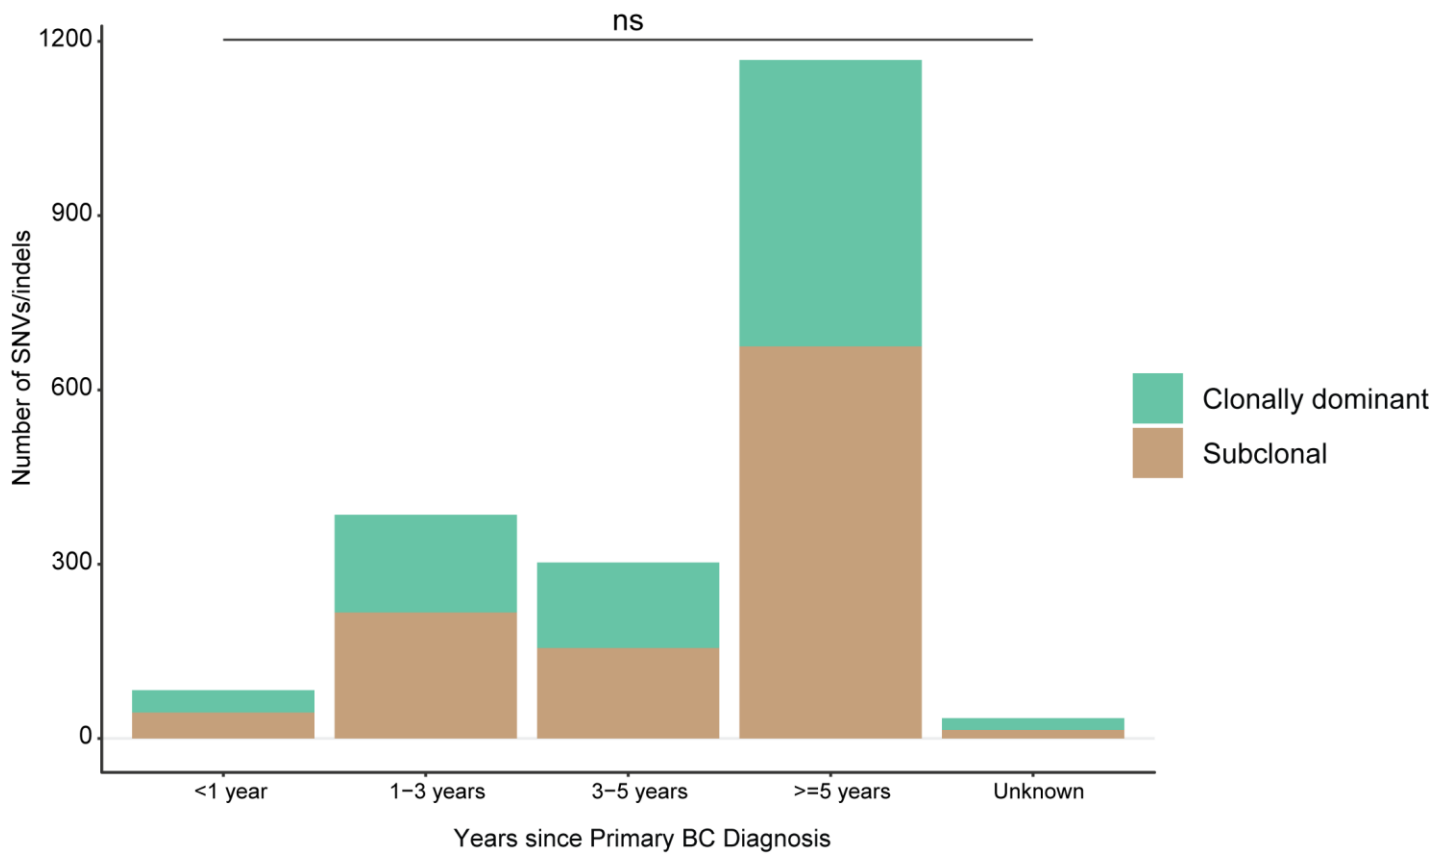

The proportion of clonally dominant to subclonal mutations (N=1974 SNVs/indels with assessable clonality) does not significantly alter with time from diagnosis of early breast cancer ( $p=0.3$ , Chi-squared test). ns, not significant

Supplementary Fig. 11. Mutational signature analysis in HER2 positive breast cancer

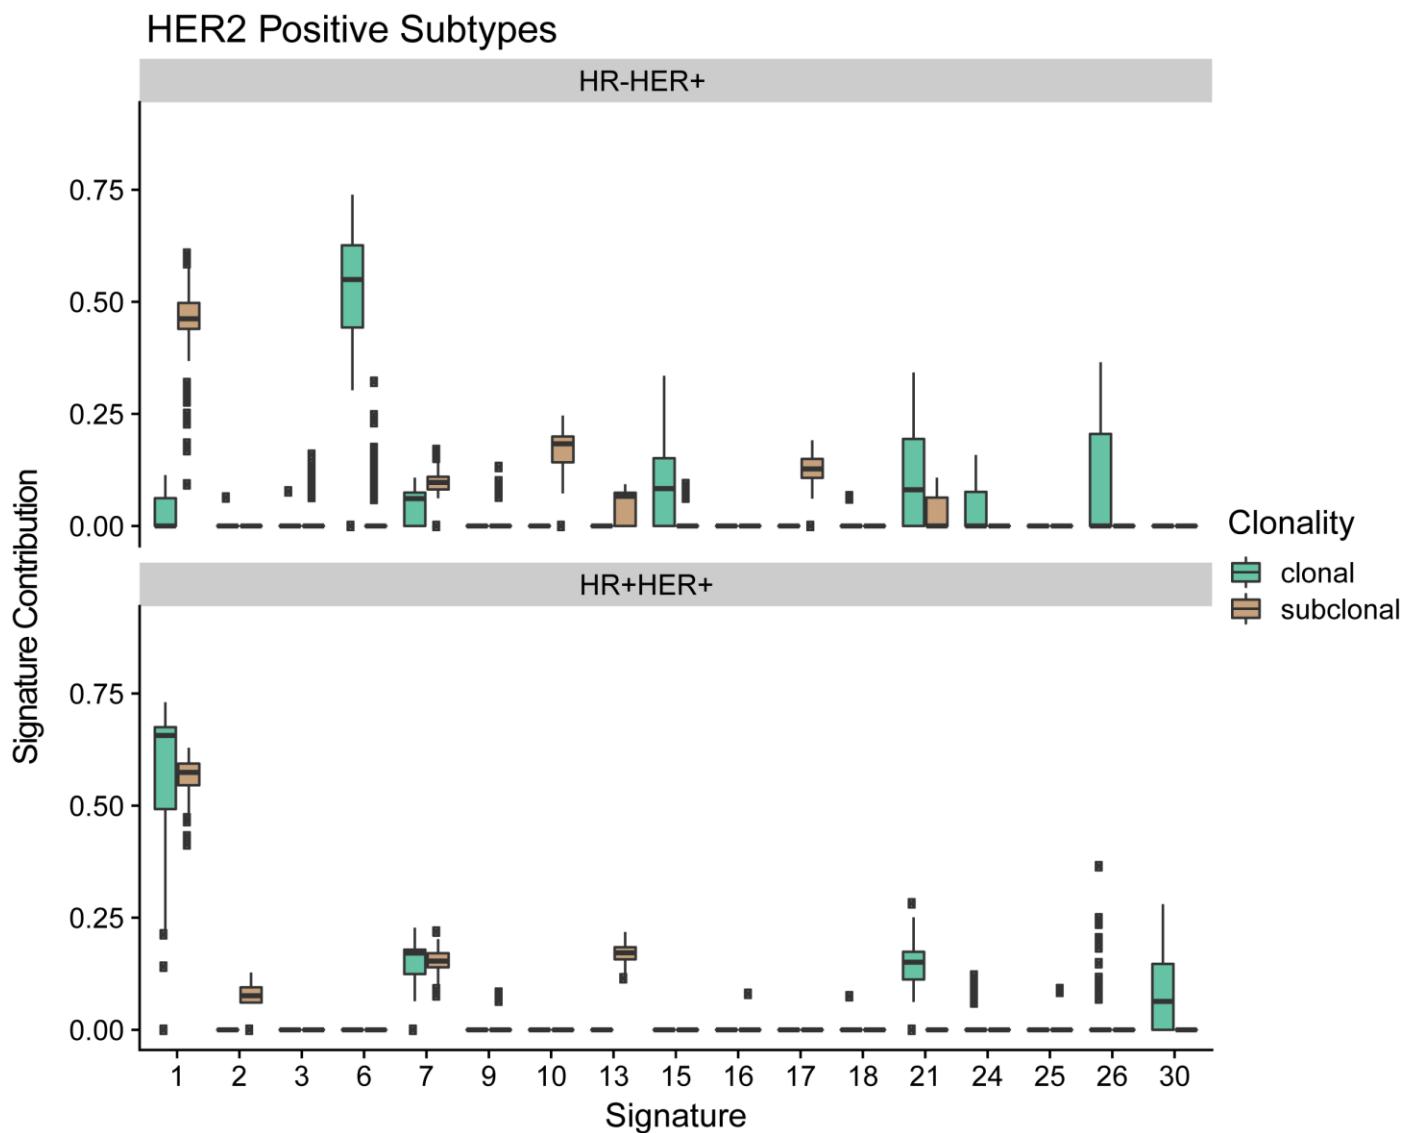

Bootstrap mutational signature analysis on aggregated mutations from all HR-HER2+ (*top*, N=29 clonal mutations, N=29 subclonal mutations) and HR+HER2+ (*bottom*, N=41 clonal mutations, N=97 subclonal mutations) and breast cancers, for clonally dominant and subclonal mutations. Data are presented as a boxplot, where the middle line is the median, the lower and upper hinges represent the 25<sup>th</sup> and 75<sup>th</sup> centiles respectively and the whiskers extend from the hinge to the smallest and largest value, respectively, no further than 1.5 x IQR (interquartile range) from the lower or upper hinge. Data outside of these ranges are plotted individually. Although analysis is underpowered, similar patterns are observed compared to TNBC and HR+HER- disease, respectively.

Supplementary Fig. 12: SigMA analysis of mutational signatures in clonally dominant and subclonal mutations in HR+HER2- and TNBC disease

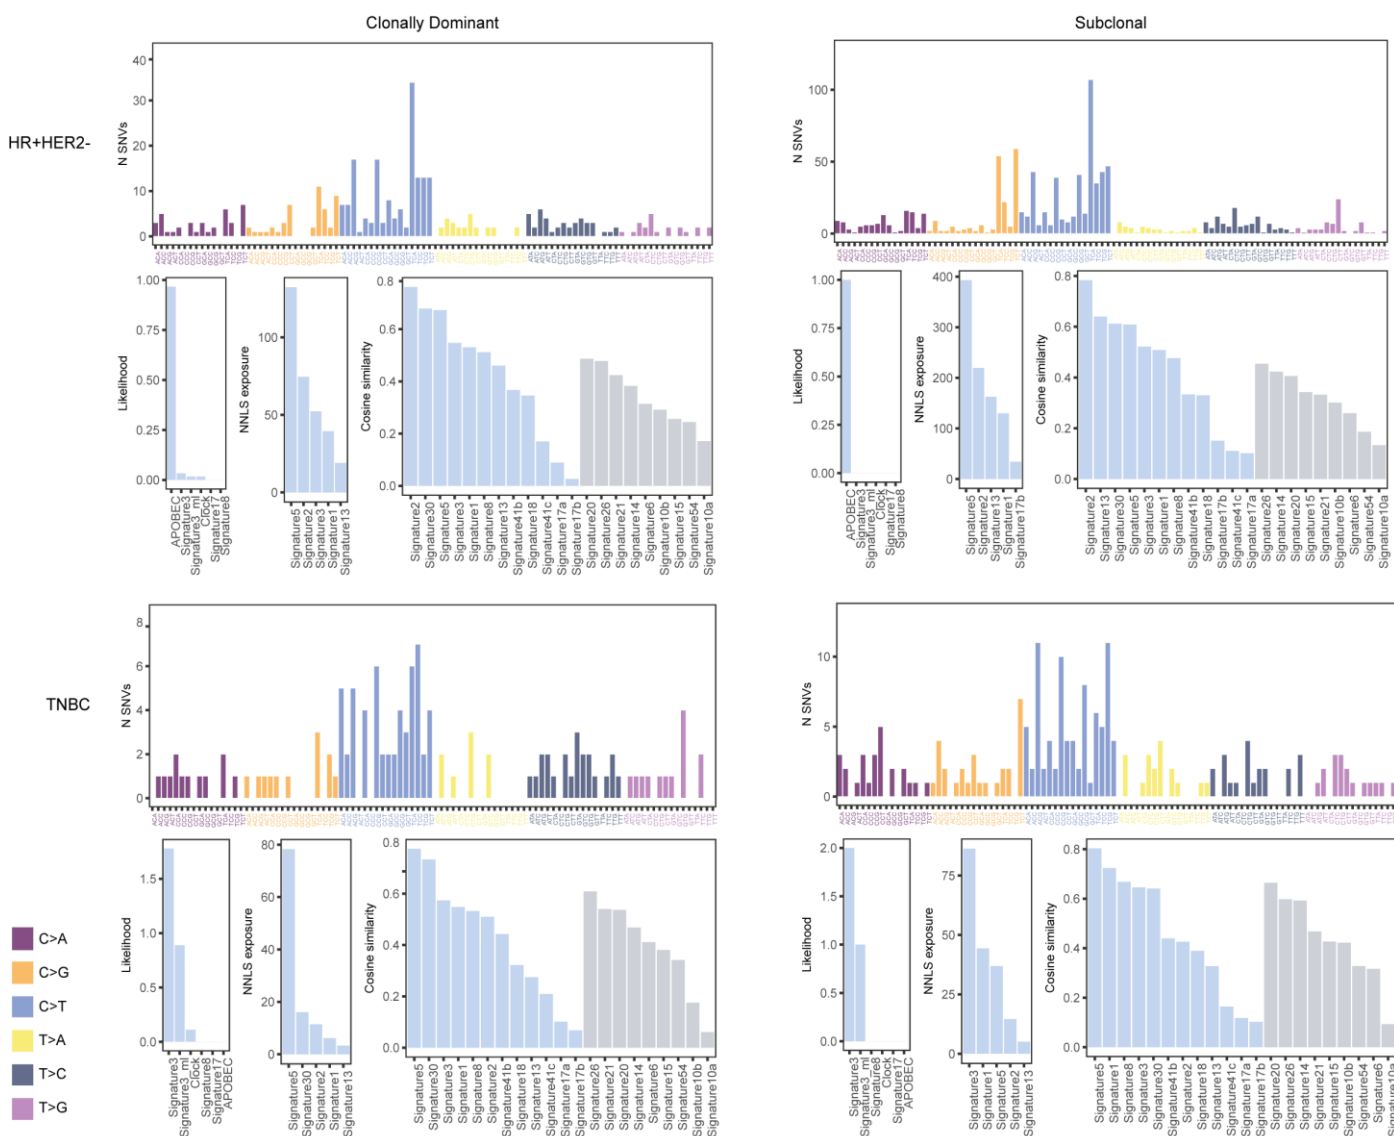

Signature analysis using SigMA<sup>4</sup> for clonally dominant (HR+HER2- N=328; TNBC N=121) and subclonal mutations (HR+HER2- N=968; TNBC N=190) in HR+HER- and TNBC breast cancer. NNLS (non-negative least squares) exposure and Cosine similarity are two orthogonal methods which identify mutational signatures within sequencing data, whilst Likelihood describes the mutational signatures ascertained as present by the SigMA software. SigMA identifies APOBEC as strongly present in all HR+HER2- disease, whilst NNLS exposure and Cosine similarity both identify

signature 13 more strongly in subclonal disease than in clonally dominant disease. In TNBC, age-related signature 1 is more strongly identified by NNLS exposure and Cosine similarity in subclonal disease than clonally dominant disease.

Supplementary Fig. 13: Validation of novel subclonal mutations in *PIK3CA* by droplet digital PCR

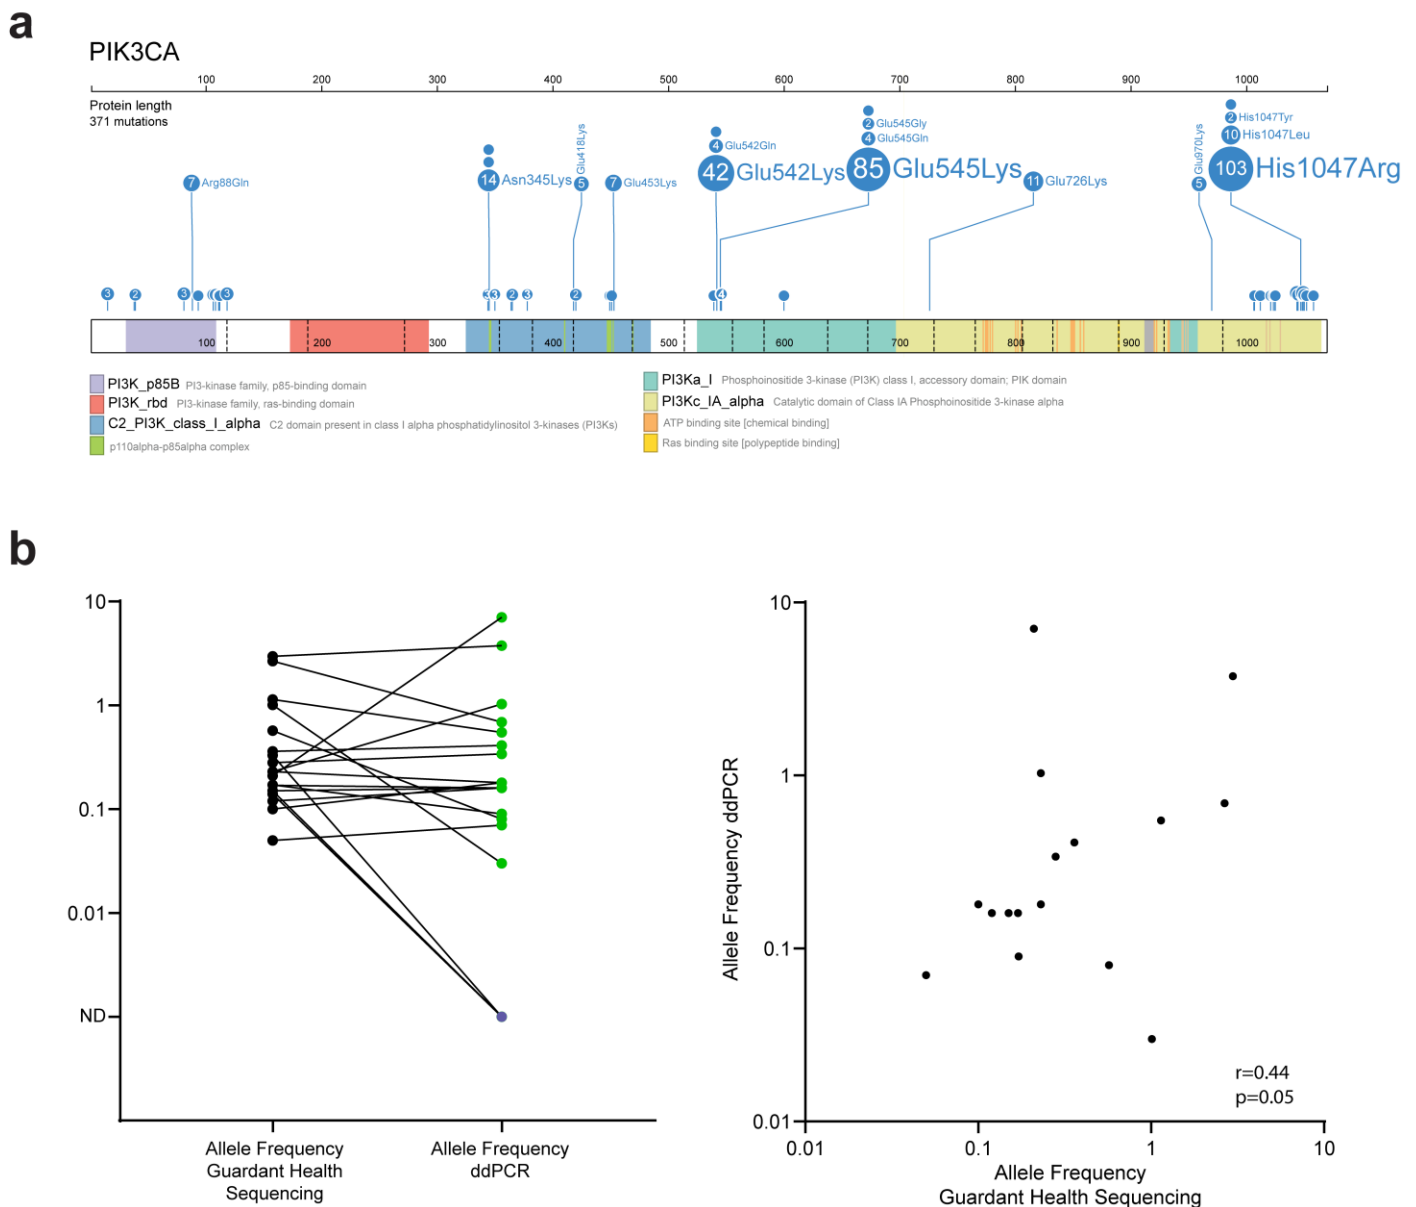

a) *PIK3CA* mutations at both common and novel hotspots. Illustration from <https://proteinpaint.stjude.org><sup>5</sup>.

b) Association between allele frequency in ctDNA sequencing and validation analysis with plasma DNA droplet digital PCR (ddPCR), n=20 *PIK3CA* mutation assays. 16/20 (80.0%) of mutations were validated by ddPCR. Spearman correlation coefficient 0.44, P=0.05 (two-sided). ND, not detected.





For each individual *PIK3CA* mutation, the proportion of patients with that mutation with multiple *PIK3CA* mutations, and plot of individual *PIK3CA* mutation cancer fraction versus indicated partner *PIK3CA* mutation.

Supplementary Fig. 15: Classes of *PIK3CA* mutation in advanced breast cancer

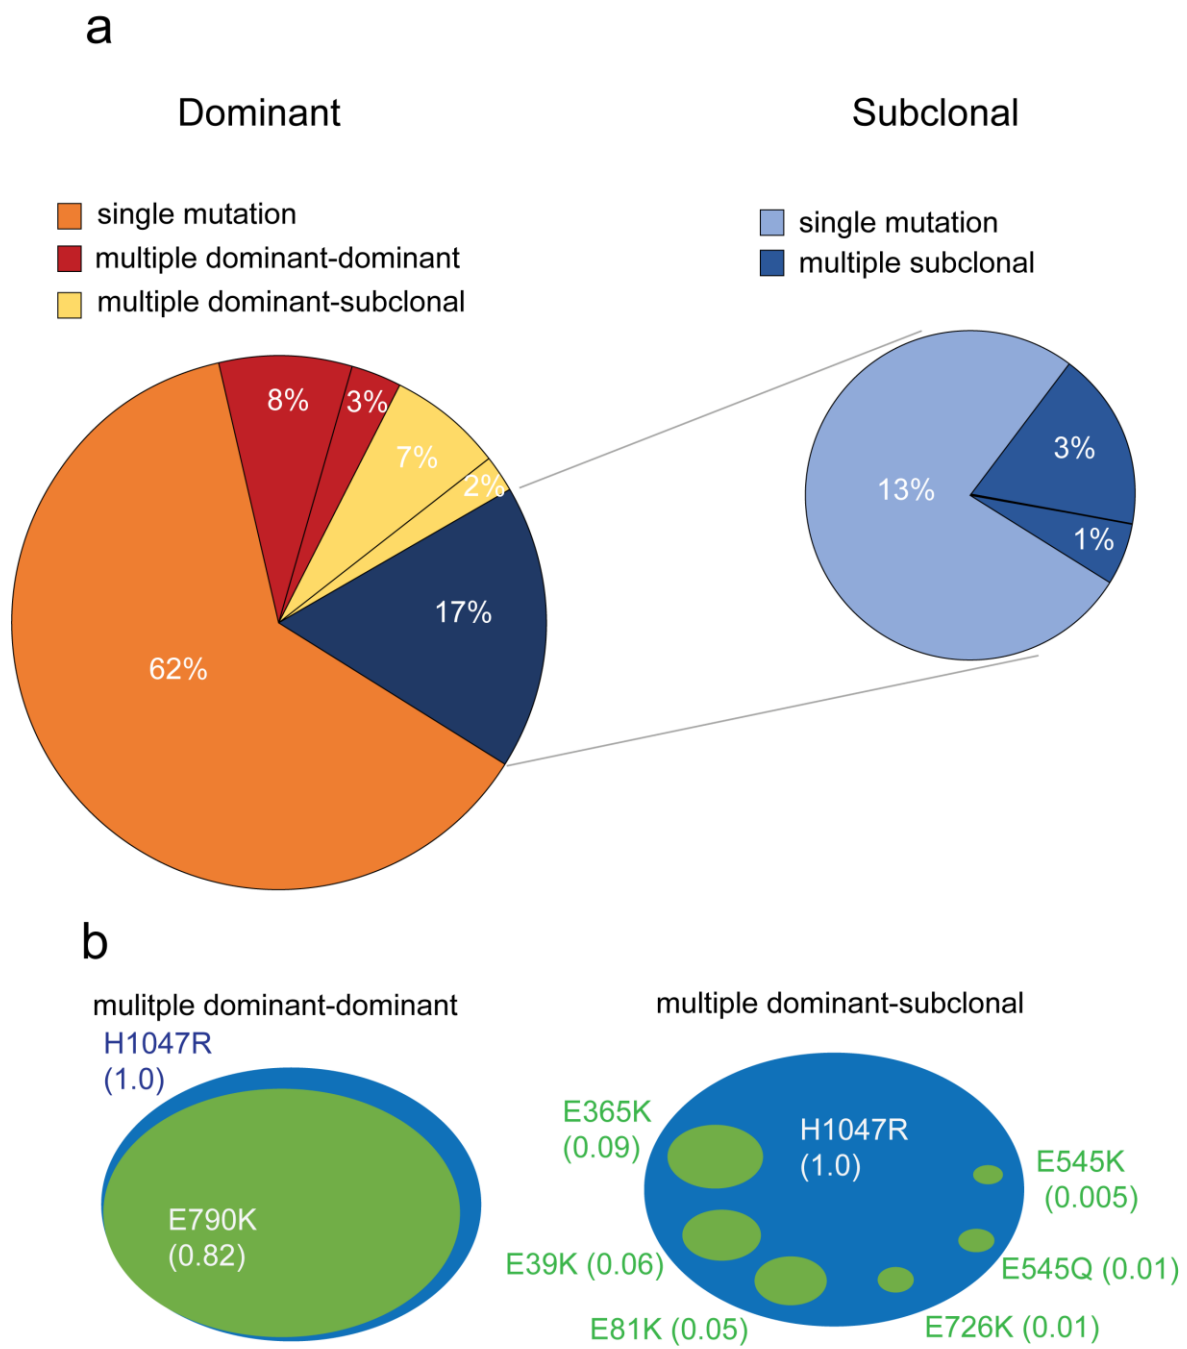

a) *PIK3CA* mutation classes in ctDNA from 293 patients with *PIK3CA* mutations detected.

*Left* 83% patients (242) have clonally dominant *PIK3CA* mutations, with 62% (183) having a single dominant mutation, 11% having at least two dominant mutations (multiple dominant-dominant: 8% [23] with 2 mutations, 3% [9] with >2 mutations) and 9% having a single dominant mutation with second subclonal mutations (multiple dominant-subclonal: 7% [20] have 2 subclonal mutations and 2% [7] >2 subclonal mutations). Future research will be required to investigate whether response rates to PI3 kinase inhibition vary by class.

*Right* 17% (51) have subclonal *PIK3CA* mutations, with 13% (38) having a single subclonal mutation and 4% have multiple subclonal mutations (multiple subclonal: 9 with 2 mutations, and 4 with multiple)

b) Examples cancer fractions of two patients; *left* multiple dominant-dominant class in a patient with two clonally dominant mutations in ctDNA; *right* multiple dominant-subclonal class in a patient with a single clonally dominant mutation and multiple subclonal mutations. Number indicates cancer fraction for indicated mutation.

Supplementary Fig. 16: Association between allele frequency and copy number in ctDNA sequencing

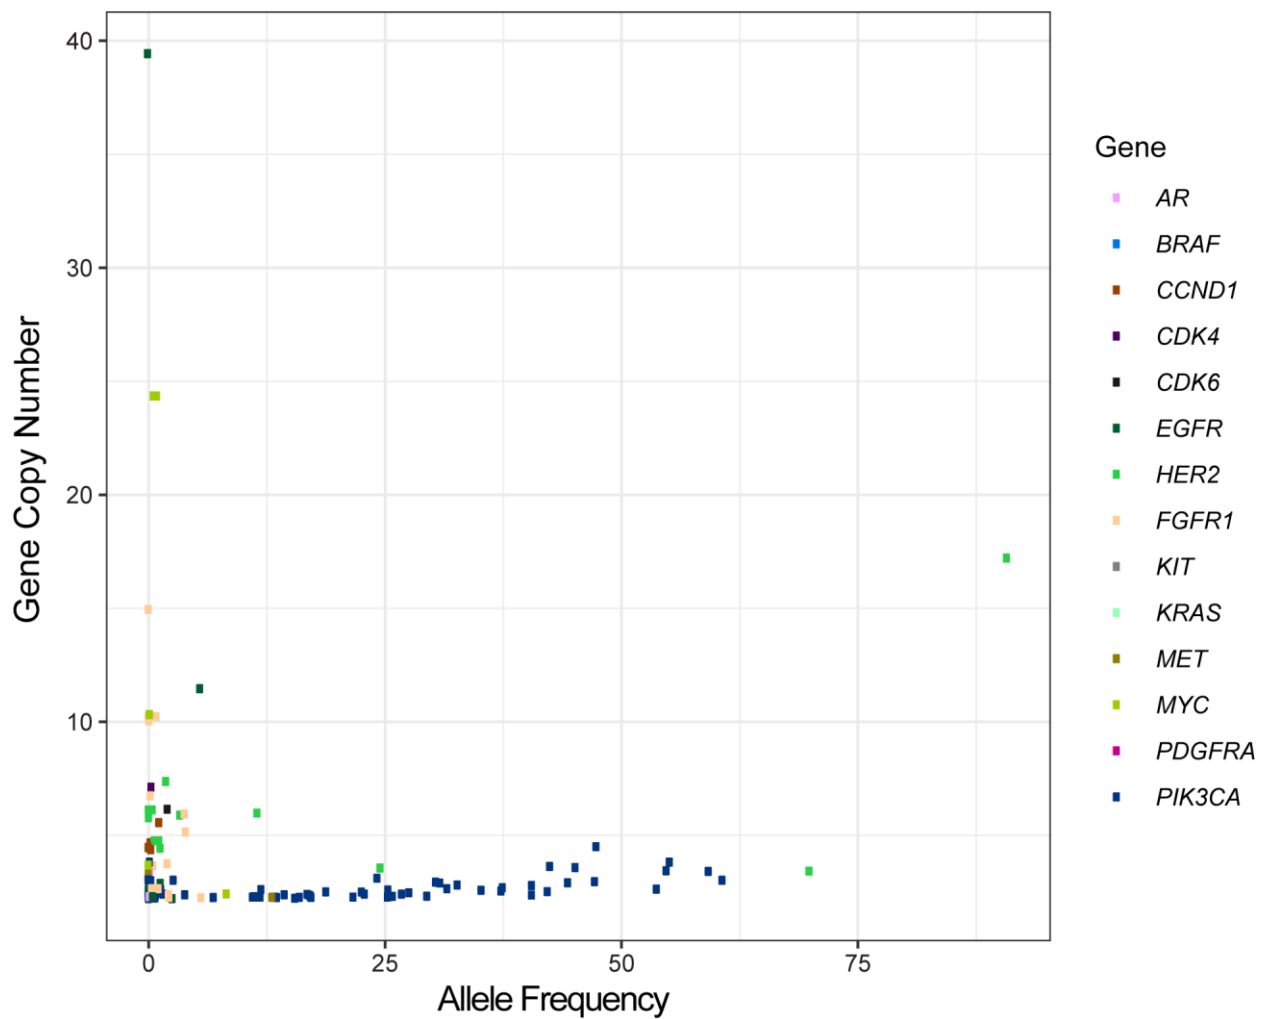

No association between mutation allele frequency and copy number, for indicated genes, Pearson correlation coefficient  $r=-0.05$ ,  $p=0.56$  (two-sided).

Supplemental Tab. 1: Clinical and pathological features of patients enrolled in the plasmaMATCH trial with ctDNA sequencing data

|                                             | N=800 |      |
|---------------------------------------------|-------|------|
|                                             | n     | %    |
| Age group (years) at registration           |       |      |
| <50                                         | 215   | 26.9 |
| 50-59                                       | 263   | 32.9 |
| 60-69                                       | 209   | 26.1 |
| ≥70                                         | 113   | 14.1 |
| Metastatic disease present at diagnosis     | 117   | 14.6 |
| Time since primary diagnosis (years)        |       |      |
| <1 year                                     | 35    | 4.4  |
| 1-3 years                                   | 170   | 21.2 |
| 3-5 years                                   | 153   | 19.1 |
| ≥5 years                                    | 421   | 52.6 |
| Not known/Missing                           | 21    | 2.6  |
| Tumor characteristics at initial diagnosis: |       |      |
| Pathological invasive tumor size (cm)       |       |      |
| ≤2cm                                        | 223   | 29.1 |
| 2-5cm                                       | 252   | 31.5 |
| >5cm                                        | 87    | 10.9 |
| Not known/Missing                           | 238   | 29.8 |
| Nodal status                                |       |      |
| N0                                          | 212   | 26.5 |
| N1-3                                        | 191   | 23.9 |
| N4+                                         | 164   | 20.5 |
| Not known/Missing                           | 233   | 29.1 |
| Histological type                           |       |      |
| Ductal                                      | 577   | 72.1 |
| Lobular                                     | 79    | 9.9  |
| Mixed ductal & lobular                      | 30    | 3.8  |
| Other invasive                              | 15    | 1.9  |
| DCIS                                        | 2     | 0.3  |
| Not known/Missing                           | 97    | 12.1 |
| Tumor grade                                 |       |      |
| G1                                          | 35    | 4.4  |
| G2                                          | 319   | 39.9 |

|                                                                                        | N=800 |      |
|----------------------------------------------------------------------------------------|-------|------|
|                                                                                        | n     | %    |
| G3                                                                                     | 322   | 40.3 |
| Not known/Missing                                                                      | 122   | 15.3 |
| Molecular subtype                                                                      |       |      |
| HR+, HER2-                                                                             | 515   | 64.4 |
| HR+, HER2+                                                                             | 46    | 5.8  |
| HR-, HER2+                                                                             | 26    | 3.3  |
| TNBC                                                                                   | 138   | 17.3 |
| HR+, HER2 unknown                                                                      | 31    | 3.9  |
| Other                                                                                  | 9     | 1.1  |
| Not known/Missing                                                                      | 35    | 4.4  |
| Disease sites                                                                          |       |      |
| Visceral                                                                               | 627   | 78.4 |
| Soft tissue/nodal                                                                      | 143   | 17.8 |
| Bone Only                                                                              | 11    | 1.4  |
| Treatment received for locally advanced/metastatic disease prior to study registration |       |      |
| Chemotherapy                                                                           |       |      |
| 1 line                                                                                 | 283   | 35.4 |
| 2 lines                                                                                | 152   | 19.0 |
| >2 lines                                                                               | 107   | 13.4 |
| Endocrine therapy                                                                      |       |      |
| 1 line                                                                                 | 253   | 31.6 |
| 2 lines                                                                                | 168   | 21.0 |
| 3 lines                                                                                | 91    | 11.4 |
| >3 lines                                                                               | 8     | 1.0  |
| Total lines of treatment received (chemotherapy and endocrine therapy combined)        |       |      |
| 0                                                                                      | 77    | 9.6  |
| 1                                                                                      | 220   | 27.5 |
| 2                                                                                      | 189   | 23.6 |
| 3                                                                                      | 134   | 16.8 |
| 4                                                                                      | 84    | 10.5 |
| 5                                                                                      | 57    | 7.1  |
| >5                                                                                     | 39    | 4.9  |
| Other systemic therapy                                                                 |       |      |
| Anti-HER2 therapy                                                                      | 64    | 8.0  |
| mTOR inhibitor (everolimus, vistusertib)                                               | 93    | 11.6 |

|                                                         | N=800 |     |
|---------------------------------------------------------|-------|-----|
|                                                         | n     | %   |
| CDK4/6 inhibitor (palbociclib, ribociclib, abemaciclib) | 77    | 9.6 |
| Immunotherapy (atezolizumab, pembrolizumab)             | 15    | 1.9 |
| Denosumab                                               | 68    | 8.5 |
| Bisphosphonate                                          | 38    | 4.8 |
| Other                                                   | 33    | 4.1 |

Supplementary Tab. 2: Comparison of MSK-IMPACT and plasmaMATCH cohorts

| Breast Cancer Subtype |               | plasmaMATCH |     |      | MSK-IMPACT |     |      | p value |
|-----------------------|---------------|-------------|-----|------|------------|-----|------|---------|
|                       |               | n cases     | n   | %    | n cases    | n   | %    |         |
| HR+HER2-              | Ductal        | 376         | 515 | 73.0 | 428        | 584 | 73.3 | 0.0003  |
|                       | Lobular       | 63          | 515 | 12.2 | 107        | 584 | 18.3 |         |
|                       | Other/missing | 76          | 515 | 14.8 | 49         | 584 | 8.4  |         |
| HR+HER2+              | Ductal        | 35          | 46  | 76.1 | 56         | 75  | 74.7 | 0.28    |
|                       | Lobular       | 2           | 46  | 4.3  | 9          | 75  | 12.0 |         |
|                       | Other/missing | 9           | 46  | 19.6 | 10         | 75  | 13.3 |         |
| HR-HER2+              | Ductal        | 20          | 26  | 76.9 | 35         | 43  | 81.4 | 0.62    |
|                       | Lobular       | 1           | 26  | 3.8  | 3          | 43  | 7.0  |         |
|                       | Other/missing | 5           | 26  | 19.2 | 5          | 43  | 11.6 |         |
| TNBC                  | Ductal        | 110         | 138 | 79.7 | 125        | 151 | 82.8 | 0.04    |
|                       | Lobular       | 6           | 138 | 4.3  | 14         | 151 | 9.3  |         |
|                       | Other/missing | 22          | 138 | 15.9 | 12         | 151 | 7.9  |         |

p values from Chi-squared test

Supplementary Tab. 3: Comparison of Clinico-pathological characteristics of patients with and without ctDNA alterations.

| Clinical Characteristic         |                   | Patients with alterations |      | Patients without alterations |      | p value |
|---------------------------------|-------------------|---------------------------|------|------------------------------|------|---------|
|                                 |                   | n = 743                   |      | n = 57                       |      |         |
|                                 |                   | n                         | %    | n                            | %    |         |
| Breast cancer subtype           | HR+HER2-          | 484                       | 65.1 | 31                           | 54.4 | 0.10    |
|                                 | HR+HER2+          | 40                        | 5.4  | 6                            | 10.5 |         |
|                                 | HR-HER2+          | 22                        | 3.0  | 4                            | 7.0  |         |
|                                 | TNBC              | 130                       | 17.5 | 8                            | 14.0 |         |
|                                 | Unknown           | 67                        | 9.0  | 8                            | 14.0 |         |
| Histology                       | Ductal            | 534                       | 71.9 | 43                           | 75.4 | 0.83    |
|                                 | Lobular           | 75                        | 10.1 | 4                            | 7.0  |         |
|                                 | Other             | 43                        | 5.8  | 4                            | 7.0  |         |
|                                 | Not known         | 91                        | 12.2 | 6                            | 10.5 |         |
| Disease burden                  | Visceral          | 586                       | 78.9 | 41                           | 71.9 | 0.41    |
|                                 | Soft tissue/nodal | 131                       | 17.6 | 12                           | 21.1 |         |
|                                 | Bone              | 10                        | 1.3  | 1                            | 1.8  |         |
|                                 | Not known         | 16                        | 2.2  | 3                            | 5.3  |         |
| Number of lines prior treatment | 0                 | 67                        | 9.0  | 10                           | 17.5 | 0.02    |
|                                 | 1-2               | 374                       | 50.3 | 35                           | 61.4 |         |
|                                 | 3-4               | 209                       | 28.1 | 9                            | 15.8 |         |
|                                 | 5+                | 93                        | 12.5 | 3                            | 5.3  |         |

p values from Chi-squared test





Supplementary Tab. 4. Primers used for ddPCR assessment of mutation status for plasmaMATCH screening and sequencing validation

| Assay use                   | Gene   | Mutation | Alteration | Singleplex/multiplex | Assay ID                     | Primer F         | Sequence                  | Primer R          | Sequence                 | WT Probe                 | Mutant Probe              |  |
|-----------------------------|--------|----------|------------|----------------------|------------------------------|------------------|---------------------------|-------------------|--------------------------|--------------------------|---------------------------|--|
| PlasmaMATCH trial screening | PIK3CA | E542K    | c.1624G>A  | Multiplex            |                              | PIK3CA.E542K_fw  | AAGCAATTTCT<br>ACACGAGA   | PIK3CA.E542K_rev  | GTGCACTTAC<br>CTGTGAC    | TCTCTGAAATCA<br>CTGAGCAG | TCTCTCTAAAATCA<br>CTGAGCA |  |
|                             |        | E545K    | c.1633G>A  | Multiplex            |                              | PIK3CA.E545K_fw  | AAGCAATTTCT<br>ACACGAGA   | PIK3CA.E545K_rev  | GTGCACTTAC<br>CTGTGAC    | TCTCTGAAATCA<br>CTGAGCAG | CTGAAATCACTAAG<br>CAGGAG  |  |
|                             |        | H1047R   | c.3140A>G  | Multiplex            |                              | PIK3CA.H1047R_fw | AAGAGGCTTT<br>GGAGTATTTTC | PIK3CA.H1047R_rev | CCAATCCATTT<br>TTGTTGTCC | TGCACATCATGG<br>TGGC     | ATGCACGTCATGGT<br>GG      |  |
|                             |        | H1047L   | c.3140A>T  | Multiplex            |                              | PIK3CA.H1047L_fw | AAGAGGCTTT<br>GGAGTATTTTC | PIK3CA.H1047L_rev | CCAATCCATTT<br>TTGTTGTCC | TGCACATCATGG<br>TGGC     | ATGCACGTCATGGT<br>GG      |  |
|                             | ESR1   | E380Q    | c.1138G>C  | Multiplex            | dHsa<br>MDXE<br>91450<br>042 |                  |                           |                   |                          |                          |                           |  |
|                             |        | L536R    | c.1607T>G  | Multiplex            | dHsa<br>MDXE<br>91450<br>042 |                  |                           |                   |                          |                          |                           |  |
|                             |        | Y537C    | c.1610A>G  | Multiplex            | dHsa<br>MDXE<br>91450<br>042 |                  |                           |                   |                          |                          |                           |  |

|  |             |       |               |                |                                                       |                |                           |                 |                    |                     |                      |
|--|-------------|-------|---------------|----------------|-------------------------------------------------------|----------------|---------------------------|-----------------|--------------------|---------------------|----------------------|
|  |             | D538G | c.1613A><br>G | Multiplex      | dHsa<br>MDXE<br>91450<br>042                          |                |                           |                 |                    |                     |                      |
|  | <i>ESR1</i> | S463P | c.1387T><br>C | Multiplex      | dHsa<br>MDXE<br>65719<br>815                          |                |                           |                 |                    |                     |                      |
|  |             | Y537N | c.1609T><br>A | Multiplex      | dHsa<br>MDXE<br>65719<br>815                          |                |                           |                 |                    |                     |                      |
|  |             | Y537S | c.1610A><br>C | Multiplex      | dHsa<br>MDXE<br>65719<br>815                          |                |                           |                 |                    |                     |                      |
|  | <i>AKT1</i> | E17K  | c.49G>A       | Singlepl<br>ex | dHsaC<br>P2000<br>031<br>and<br>dHsaC<br>P2000<br>032 |                |                           |                 |                    |                     |                      |
|  | <i>HER2</i> | S310F | c.929C>T      | Singlepl<br>ex |                                                       | ERBB2.S310F_fw | CTCCTTAGACA<br>ACTACCTTTC | ERBB2.S310F_rev | GTTGTGCAGG<br>GGGC | AGGGTGCAGGA<br>TCCC | AGGGTGCAGAATC<br>CCA |

|                        |               |                          |                    |                |  |                  |                                        |                   |                                      |                          |                                |
|------------------------|---------------|--------------------------|--------------------|----------------|--|------------------|----------------------------------------|-------------------|--------------------------------------|--------------------------|--------------------------------|
|                        | <i>HER2</i>   | S310Y                    | c.929C>A           | Singlepl<br>ex |  | ERBB2.S310Y_fw   | CTCCTTAGACA<br>ACTACCTTTC              | ERBB2.S310Y_rev   | GTTGTGCAGG<br>GGGC                   | AGGGTGCAGGA<br>TCCC      | AGGGTGCAGTATC<br>CCA           |
|                        | <i>HER2</i>   | L755S                    | c.2264T><br>C      | Singlepl<br>ex |  | ERBB2.755_fw     | GAGAATGTGA<br>AAATTCCAGTG              | ERBB2.755_rev     | TAGCAGGAGA<br>GGGTGG                 | TGTTTTCCCTCA<br>ACACTTTG | TCCCTCGACACTTT<br>GATG         |
|                        | <i>HER2</i>   | V777L                    | c.2329G><br>T      | Singlepl<br>ex |  | ERBB2.777_fw     | CAGCGTACCC<br>TTGTCC                   | ERBB2.777_rev     | AGAAGGCGGG<br>AGACAT                 | TGGCTGGTGTG<br>GGC       | ATGGCTGGTTTGG<br>GC            |
|                        | <i>HER2</i>   | P780_Y<br>781insG<br>SP  | c.2339_23<br>40ins | Singlepl<br>ex |  | ERBB2.GSP_fw     | CAGCGTACCC<br>TTGTCCC                  | ERBB2.GSP_rev     | GTCAGGCAGA<br>TGCCCAGA               | TGCTTCGTGCAC<br>ACGGTGC  | GGGCTCCCCGGGC<br>TCCC          |
|                        | <i>HER2</i>   | A775_G<br>776insY<br>VMA | c.2325_23<br>26ins | Singlepl<br>ex |  | ERBB2.YVMA_fw    | CAGCGTACCC<br>TTGTCCC                  | ERBB2.YVMA_rev    | GTCAGGCAGA<br>TGCCCAGA               | TGCTTCGTGCAC<br>ACGGTGC  | ATACGTGATGGCTT<br>ACGTGATGGCTG |
| Mutation<br>Validation | <i>PIK3CA</i> | E545K                    | c.1633G><br>A      | Singlepl<br>ex |  | PIK3CA.E545K_fw  | AAGCAATTTCT<br>ACACGAGA                | PIK3CA.E545K_rev  | GTGCACTTAC<br>CTGTGAC                | TCTCTGAAATCA<br>CTGAGCAG | CTGAAATCACTAAG<br>CAGGAG       |
|                        | <i>PIK3CA</i> | E542Q                    | c.1624G><br>C      | Singlepl<br>ex |  | PMV_01_F         | AGCTCAAAGC<br>AATTTCTACAC<br>GAGAT     | PMV_01_R          | CTGTGACTCC<br>ATAGAAAATCT<br>TTCTCCT | CCTCTCTCTGAA<br>ATCA     | CCTCTCTCTAAAT<br>CA            |
|                        | <i>PIK3CA</i> | E726K                    | c.2176G><br>A      | Singlepl<br>ex |  | PMV_03_F         | CATTAAC TTAA<br>CTGACATTCTC<br>AAACAGG | PMV_03_R          | AACACAAACTA<br>GAGTCACACA<br>CCTTT   | AGAAGAAGGAT<br>GAAACAC   | AGAAGAAGGATAAA<br>ACAC         |
|                        | <i>PIK3CA</i> | E545Q                    | c.1633G><br>C      | Singlepl<br>ex |  | PMV_02_F         | TCAAAGCAATT<br>TCTACACGAG<br>ATCCT     | PMV_02_R          | CACTTACCTGT<br>GACTCCATAG<br>AAAATCT | TCTCCTGCTCAG<br>TGATT    | CTCCTGCTGAGTA<br>TT            |
|                        | <i>PIK3CA</i> | H1047R                   | c.3140A><br>G      | Singlepl<br>ex |  | PIK3CA.H1047R_fw | AAGAGGCTTT<br>GGAGATTTC                | PIK3CA.H1047R_rev | CCAATCCATTT<br>TTGTTGTCC             | TGCACATCATGG<br>TGGC     | ATGCACGTCATGGT<br>GG           |

|             |        |               |                |  |          |                          |          |                                  |                       |                       |
|-------------|--------|---------------|----------------|--|----------|--------------------------|----------|----------------------------------|-----------------------|-----------------------|
| <i>HER2</i> | G727A  | c.2180G><br>C | Singlepl<br>ex |  | PMV_07_F | AGACGGAGCT<br>GAGGAAGGT  | PMV_07_R | CCTTGTAGACT<br>GTGCCAAAAG<br>C   | AAGGTGCTTGG<br>ATCTG  | AAGGTGCTTGCATC<br>TG  |
| <i>HER2</i> | E717D  | c.2151G><br>C | Singlepl<br>ex |  | PMV_06_F | GCGCAGATGC<br>GGATCCT    | PMV_06_R | CAGATCCAAG<br>CACCTTCACCT<br>T   | TCAGCTCCGTCT<br>CTTT  | AGCTCCGTGTCTTT        |
| <i>HER2</i> | Q711H  | c.2133G><br>C | Singlepl<br>ex |  | PMV_05_F | GGAGCGATGC<br>CCAACCA    | PMV_05_R | CCTCAGCTCC<br>GTCTCTTTCAG        | ATCCGCATCTGC<br>GCC   | CCGCATGTGCGCC         |
| <i>HER2</i> | L786V  | c.2356C><br>G | Singlepl<br>ex |  | PMV_09_F | TGTGGGCTCC<br>CCATATGTCT | PMV_09_R | GCTGCACCGT<br>GGATGTCA           | CCGCCTTCTGG<br>GCAT   | CGCCTTGTGGGCA<br>T    |
| <i>HER2</i> | I628M  | c.1884C><br>G | Singlepl<br>ex |  | PMV_04_F | GGAGGGCGCA<br>TGCCA      | PMV_04_R | GCAGAAAAGA<br>CCGTTGGACT<br>CA   | TTGCCCCATCAA<br>CTG   | TTGCCCCATGAACT<br>G   |
| <i>HER2</i> | D1105N | c.3313G><br>A | Singlepl<br>ex |  | PMV_14_F | GGGCTGCAAA<br>GCCTC      | PMV_14_R | TCCTCACTGTA<br>CCGCTGTAGA        | CCCACACATGAC<br>CCCAG | CCCACACATAACCC<br>CAG |
| <i>HER2</i> | S1002N | c.3005G><br>A | Singlepl<br>ex |  | PMV_12_F | GGGCCAGCC<br>AGTCC       | PMV_12_R | CATCGTCCTC<br>CAGCAGTGA          | TTGGACAGCAC<br>CTTC   | CTTGGACAACACCT<br>TC  |
| <i>HER2</i> | L800R  | c.2399T><br>G | Singlepl<br>ex |  | PMV_10_F | GGCATCTGCC<br>TGACATCCA  | PMV_10_R | GTTTTCCCGG<br>ACATGGTCTAA<br>GAG | ACACAGCTTATG<br>CCC   | ACAGCGTATGCCC         |
| <i>HER2</i> | L800P  | c.2399T><br>C | Singlepl<br>ex |  | PMV_11_F | GGCATCTGCC<br>TGACATCCA  | PMV_11_R | GTTTTCCCGG<br>ACATGGTCTAA<br>GAG | TGACACAGCTTA<br>TGCC  | TGACACAGCCTATG<br>CC  |

|             |        |               |                |  |                |                                   |                 |                                   |                            |                            |
|-------------|--------|---------------|----------------|--|----------------|-----------------------------------|-----------------|-----------------------------------|----------------------------|----------------------------|
| <i>HER2</i> | Q1206K | c.3616C><br>A | Singlepl<br>ex |  | PMV_16_F       | GGAGAACCCC<br>GAGTACTTGA<br>C     | PMV_16_R        | GGCTGAAGGC<br>AGGAGGAG            | TGCCCTCAGC<br>CCCA         | TGCCCTAAGCCC<br>CA         |
| <i>HER2</i> | R1153Q | c.3458G><br>A | Singlepl<br>ex |  | PMV_15_F       | CAGAATATGT<br>GAACCAGCCA<br>GATGT | PMV_15_R        | GGGCAGCAGG<br>CAGAGG              | CCTTCGCCCG<br>AGAGG        | CTTCGCCCAAGA<br>GG         |
| <i>HER2</i> | E1079K | c.3235G><br>A | Singlepl<br>ex |  | PMV_13_F       | AGGCCCCAG<br>GTCTCC               | PMV_13_R        | TTCCCAGGTC<br>ACCATCAAATA<br>CATC | CTGGCACCTC<br>CGAAGG       | TGGCACCTCCAAA<br>GG        |
| <i>HER2</i> | V777M  | c.2329G><br>A | Singlepl<br>ex |  | PMV_08_F       | GTCCCAGGA<br>AGCATACGT            | PMV_08_R        | CAGAAGGCGG<br>GAGACATATG<br>G     | ATGGCTGGTGT<br>GGGCT       | ATGGCTGGTATGG<br>GCT       |
| <i>HER2</i> | D769H  | c.2305G><br>C | Singlepl<br>ex |  | 2305G_C_F      | ACATCCCCA<br>AAGCCAACAA<br>A      | 2305G_C_R       | GTCCTTCCTGT<br>CCTCCTAGCA         | CTTACGTCTAAG<br>ATTTC      | TTACGTGTAAGATT<br>TC       |
| <i>HER2</i> | D769Y  | c.2305G><br>T | Singlepl<br>ex |  | 2305G_T_F      | GGAAAACACA<br>TCCCCAAAG<br>C      | 2305G_T_R       | GTCCTTCCTGT<br>CCTCCTAGCA         | CAAAGAAATCTT<br>AGACGTAAGC | CAAAGAAATCTTAT<br>ACGTAAGC |
| <i>HER2</i> | L755S  | c.2264T><br>C | Singlepl<br>ex |  | ERBB2.755_fw   | GAGAATGTGA<br>AAATTCCAGTG         | ERBB2.755_rev   | TAGCAGGAGA<br>GGGTGG              | TGTTTTCCCTCA<br>ACACTTGT   | TCCCTGACACTTT<br>GATG      |
| <i>HER2</i> | I767M  | c.2301C><br>G | Singlepl<br>ex |  | ERBB2.767_fw   | GAGAATGTGA<br>AAATTCCAGTG         | ERBB2.767_rev   | TAGCAGGAGA<br>GGGTGG              | AAGAAATCTTAG<br>ACGTAAGCC  | AAGAAATGTTAGAC<br>GTAAGCC  |
| <i>HER2</i> | S310F  | c.929C>T      | Singlepl<br>ex |  | ERBB2.S310F_fw | CTCCTTAGACA<br>ACTACCTTTC         | ERBB2.S310F_rev | GTTGTGCAGG<br>GGGC                | AGGGTGCAGGA<br>TCCC        | AGGGTGCAGAATC<br>CCA       |

## Supplementary References

1. Turner, N.C., *et al.* Circulating tumour DNA analysis to direct therapy in advanced breast cancer (plasmaMATCH): a multicentre, multicohort, phase 2a, platform trial. *The Lancet Oncology*.
2. Lanman, R.B., *et al.* Analytical and Clinical Validation of a Digital Sequencing Panel for Quantitative, Highly Accurate Evaluation of Cell-Free Circulating Tumor DNA. *PLoS One* **10**, e0140712 (2015).
3. Comprehensive molecular portraits of human breast tumours. *Nature* **490**, 61-70 (2012).
4. Gulhan, D.C., Lee, J.J.-K., Melloni, G.E.M., Cortés-Ciriano, I. & Park, P.J. Detecting the mutational signature of homologous recombination deficiency in clinical samples. *Nature Genetics* **51**, 912-919 (2019).
5. Zhou, X., *et al.* Exploring genomic alteration in pediatric cancer using ProteinPaint. *Nature Genetics* **48**, 4-6 (2016).
